# Supplementary material for: Evaluation Using Polar Coordinate of the Representation of Movement in the Drawings of Children Aged 5 to 8 Years
Source: MDPI journal article supplement (doi:10.3390/ijerph19052844), 2022-03-01

## Supplementary Material

### Evaluation using polar coordinate of the representation of movement in the drawing of children aged 5 to 8 years

**Table S1. Indicators of graphic representation of movement with very significant relationships ( $P < 0.001$ ) between focal and conditione behavior.**

| 5 AGE                            |               |                |                |                         |                     |        |        |              |    |
|----------------------------------|---------------|----------------|----------------|-------------------------|---------------------|--------|--------|--------------|----|
| Character<br>Rabbit              | Macrocategory | Category       | Focal behavior | Conditioned<br>behavior | Significant vectors |        |        |              |    |
|                                  |               |                |                |                         | Quadrant            | Length | Angle  | Significance |    |
|                                  |               | Estatic        | Vertical-front | 1_evfcf                 | 3_evfbcr            | I      | 2,87   | 85,62        | ** |
| 2_evfbc                          |               |                |                |                         | III                 | 2,76   | 268,34 | **           |    |
| 2_evfbc                          |               |                |                | 1_ehpcfpi               | I                   | 2,76   | 1,66   | **           |    |
|                                  |               |                |                | 2_ehpcfpi               | I                   | 2,76   | 1,66   | **           |    |
|                                  |               |                |                | 1_evfcf                 | III                 | 2,76   | 181,66 | **           |    |
|                                  |               |                |                | 4_evfpj                 | III                 | 2,76   | 181,66 | **           |    |
| 3_evfbcr                         |               |                |                | 1_evfcf                 | I                   | 2,87   | 4,38   | **           |    |
|                                  |               |                |                | 4_evfpj                 | I                   | 2,87   | 4,38   | **           |    |
|                                  |               |                |                | 8_evfor                 | I                   | 3,41   | 7,99   | **           |    |
|                                  |               |                |                | 1_ehpcfpi               | III                 | 2,87   | 184,38 | **           |    |
|                                  |               |                |                | 2_ehpcfpi               | III                 | 2,87   | 184,38 | **           |    |
|                                  |               |                |                | 6_evfpf                 | IV                  | 3,67   | 348,97 | **           |    |
| 4_evfpj                          |               |                |                | 3_evfbcr                | I                   | 2,87   | 85,62  | **           |    |
|                                  |               |                |                | 2_evfbc                 | III                 | 2,76   | 268,34 | **           |    |
|                                  |               |                |                | 3_evfbcr                | II                  | 3,67   | 101,03 | **           |    |
| 8_evfor                          |               |                |                | 3_evfbcr                | I                   | 3,41   | 82,01  | **           |    |
| Horizontal<br>Face Front Profile |               |                | 1_ehpcfpi      | 2_evfbc                 | I                   | 2,76   | 88,34  | **           |    |
|                                  |               |                |                | 3_evfbcr                | III                 | 2,87   | 265,62 | **           |    |
|                                  |               |                | 2_ehpcfpi      | 2_evfbc                 | I                   | 2,76   | 88,34  | **           |    |
|                                  |               |                |                | 3_evfbcr                | III                 | 2,87   | 265,62 | **           |    |
|                                  |               |                | 3_ehpcffor     | 2_evfbc                 | I                   | 2,76   | 88,34  | **           |    |
|                                  |               |                |                | 3_evfbcr                | III                 | 2,87   | 265,62 | **           |    |
| Indication                       |               |                |                |                         |                     |        |        |              |    |
| Movement                         |               | Vertical-Front | 1_mvfcpi       | 2_mvptr                 | II                  | 2,6    | 110,55 | **           |    |
|                                  |               |                |                | 5_mvfpdi                | IV                  | 2,82   | 320,72 | **           |    |
|                                  |               |                | 2_mvfbdi       | 1_mvptbed               | I                   | 3,64   | 11,52  | **           |    |
|                                  |               |                |                | 2_mvptr                 | I                   | 3,23   | 19,11  | **           |    |
|                                  |               |                |                | 4_mvfpis                | III                 | 2,81   | 266,9  | **           |    |
|                                  |               |                |                | 5_mvfpdi                | III                 | 3,27   | 208,46 | **           |    |
|                                  |               |                | 4_mvfpis       | 2_mvptr                 | II                  | 2,65   | 120,38 | **           |    |
|                                  |               |                |                | 2_mvfbdi                | III                 | 2,81   | 183,1  | **           |    |
|                                  |               |                |                | 5_mvfpdi                | IV                  | 2,83   | 329,85 | **           |    |
|                                  |               |                |                | 6_mvfpdi                | IV                  | 3,71   | 342,14 | **           |    |
|                                  |               |                |                | 7_mvfpdi                | IV                  | 2,98   | 337,55 | **           |    |

|                |               |                               |                |                      |                     |        |        |              |  |
|----------------|---------------|-------------------------------|----------------|----------------------|---------------------|--------|--------|--------------|--|
|                |               |                               | 5_mvfped       | 7_mvfmfp             | I                   | 2,65   | 37,4   | **           |  |
|                |               |                               |                | 1_mvfcfp             | II                  | 2,82   | 129,28 | **           |  |
|                |               |                               |                | 4_mvffps             | II                  | 2,83   | 120,15 | **           |  |
|                |               |                               |                | 2_mvffbed            | III                 | 3,27   | 241,54 | **           |  |
|                |               |                               | 6_mvffpea      | 4_mvffps             | II                  | 3,71   | 107,86 | **           |  |
|                |               |                               | 7_mvfmfp       | 5_mvffped            | I                   | 2,65   | 52,6   | **           |  |
|                |               |                               |                | 10_mvffppe           | I                   | 2,75   | 30,58  | **           |  |
|                |               |                               |                | 4_mvffps             | II                  | 2,98   | 112,45 | **           |  |
|                |               |                               | 10_mvffppe     | 7_mvfmfp             | I                   | 2,75   | 59,42  | **           |  |
|                |               |                               | 11_mvffba      | 1_mvffptbed          | I                   | 3,11   | 77,17  | **           |  |
|                |               | Complete Vertical Profile     | 1_mvffptbed    | 2_mvffbed            | I                   | 3,64   | 78,48  | **           |  |
|                |               |                               |                | 8_mvffpc             | IV                  | 2,76   | 350,94 | **           |  |
|                |               |                               |                | 12_mvffba            | IV                  | 3,1    | 356,06 | **           |  |
|                |               |                               | 2_mvffptr      | 2_mvffbed            | I                   | 3,23   | 70,89  | **           |  |
|                |               |                               |                | 1_mvffcp             | IV                  | 2,6    | 339,45 | **           |  |
|                |               |                               |                | 4_mvffps             | IV                  | 2,65   | 329,62 | **           |  |
| Character Wolf | Macrocategory | Category                      | Focal behavior | Conditioned behavior | Significant vectors |        |        |              |  |
|                |               |                               |                |                      | Quadrant            | Length | Angle  | Significance |  |
|                | Estatic       |                               |                |                      |                     |        |        |              |  |
|                | Indication    | Horizontal Face Front Profile | 1_ihptice      | 2-ihpcficecg         | IV                  | 3,01   | 293,48 | **           |  |
|                | Movement      | Vertical-front                | 1_mvffcp       | 3_mvffbea            | I                   | 2,6    | 114,35 | **           |  |
|                |               |                               |                | 8_mvffpc             | II                  | 2,62   | 320,72 | **           |  |
|                |               |                               |                | 1_mvffptbed          | II                  | 2,65   | 114,35 | **           |  |
|                |               |                               |                | 2_mvffptr            | II                  | 2,65   | 114,35 | **           |  |
|                |               |                               |                | 1_mhpcfpppe          | I                   | 3,08   | 4,98   | **           |  |
|                |               |                               |                | 2_mhpcfca            | III                 | 2,81   | 244,94 | **           |  |
|                |               |                               |                | 1_mhptr              | II                  | 2,74   | 113,26 | **           |  |
|                |               |                               | 3_mvffbea      | 1_mvffcp             | I                   | 2,6    | 87,83  | **           |  |
|                |               |                               |                | 4_mvffps             | II                  | 4,21   | 106,94 | **           |  |
|                |               |                               |                | 7_mvfmfp             | IV                  | 2,88   | 338,14 | **           |  |
|                |               |                               |                | 1_mhpcfpppe          | I                   | 3,84   | 51,08  | **           |  |
|                |               |                               | 4_mvffps       | 3_mvffbea            | IV                  | 4,21   | 343,06 | **           |  |
|                |               |                               |                | 1_mhpcfpppe          | IV                  | 2,64   | 328,89 | **           |  |
|                |               |                               | 5_mvffped      | 2_mhpcfca            | I                   | 2,67   | 63,36  | **           |  |
|                |               |                               | 7_mvfmfp       | 3_mvffbea            | II                  | 2,88   | 11,86  | **           |  |
|                |               |                               |                | 2_mhpcfca            | IV                  | 3,64   | 333,51 | **           |  |
|                |               |                               | 8_mvffpc       | 1_mvffcp             | IV                  | 2,62   | 335,65 | **           |  |
|                |               | Complete Vertical Profile     | 2_mvffptr      | 1_mvffcp             | IV                  | 2,65   | 335,92 | **           |  |
|                |               |                               |                | 8_mvffpc             | IV                  | 2,76   | 350,94 | **           |  |
|                |               |                               |                | 12_mvffba            | IV                  | 3,1    | 356,06 | **           |  |
|                |               | Horizontal Face Front Profile | 1_mhpcfpppe    | 1_mvffcp             | I                   | 3,08   | 85,02  | **           |  |
|                |               |                               |                | 3_mvffbea            | I                   | 3,84   | 38,92  | **           |  |
|                |               |                               |                | 4_mvffps             | II                  | 2,64   | 121,11 | **           |  |

|                           |               |                               |                |                      |                     |        |        |              |
|---------------------------|---------------|-------------------------------|----------------|----------------------|---------------------|--------|--------|--------------|
|                           |               |                               | 2_mhpcfca      | 1_mvfcfcp            | III                 | 2,81   | 205,06 | **           |
|                           |               |                               |                | 5_mvfpced            | I                   | 2,67   | 26,64  | **           |
|                           |               |                               |                | 7_mvffmp             | II                  | 3,64   | 116,49 | **           |
|                           |               | Complete Horizontal Profile   | 1_mhptr        | IV                   | 2,74                | 336,74 | **     |              |
|                           |               |                               | 2_mhptca       | IV                   | 2,65                | 329,72 | **     |              |
|                           |               |                               | 2_mhpcfca      | II                   | 3,11                | 90,04  | **     |              |
| 6 AGE                     |               |                               |                |                      |                     |        |        |              |
| Character Rabbit          | Macrocategory | Category                      | Focal behavior | Conditioned behavior | Significant vectors |        |        |              |
|                           |               |                               |                |                      | Quadrant            | Length | Angle  | Significance |
|                           | Estatic       |                               |                |                      |                     |        |        |              |
|                           | Indication    |                               | ivficecg       | Frente1_ivficecg     | I                   | 3,56   | 45     | **           |
|                           | Movement      |                               |                |                      |                     |        |        |              |
| Character Wolf            | Macrocategory | Category                      | Focal behavior | Conditioned behavior | Significant vectors |        |        |              |
|                           |               |                               |                |                      | Quadrant            | Length | Angle  | Significance |
|                           | Estatic       | Vertical-front                | vfbc           | 2_vfbc               | I                   | 3,05   | 56,97  | **           |
|                           |               |                               | vfpb           | 2_vfbc               | I                   | 2,98   | 90     | **           |
|                           | Indication    |                               |                |                      |                     |        |        |              |
|                           | Movement      | Vertical-front                | mvfcfcp        | 2_mvptbea            | I                   | 2,98   | 65,56  | **           |
|                           |               |                               | mvfbcd         | 3_mhpcfpea           | II                  | 2,98   | 101,42 | **           |
|                           |               |                               |                | 5_mhpcffpc           | II                  | 2,98   | 101,42 | **           |
|                           |               |                               |                | mvffbc               | 5_mhptfpc           | I      | 4,24   | 90           |
|                           |               |                               |                | 10_mhptca            | II                  | 2,87   | 94,75  | **           |
|                           |               |                               | mvffpa         | 3_mhpcfpea           | II                  | 3,18   | 95,5   | **           |
|                           |               |                               | 5_mhpcffpc     | II                   | 3,18                | 95,5   | **     |              |
|                           |               | Vertical Face Front Profile   | mvpcffba       | 5_mhptfpc            | I                   | 4,24   | 90     | **           |
|                           |               |                               |                | 10_mhptca            | II                  | 2,87   | 94,75  | **           |
| Complete Vertical Profile |               | mvptbed                       | 10_mhptca      | IV                   | 3,02                | 351,74 | **     |              |
|                           | mvptbea       | 1_mvfcfcp                     | I              | 2,98                 | 24,44               | **     |        |              |
|                           |               | Horizontal Face Front Profile | mhpcfped       | 9_mhpcfcoa           | I                   | 4,2    | 56,86  | **           |
|                           |               |                               |                | 3_mhptpea            | II                  | 3,54   | 98,05  | **           |
|                           |               |                               | mhpcfpea       | 2_mvfbcd             | IV                  | 2,98   | 348,58 | **           |
|                           |               |                               |                | 11_mvffpa            | IV                  | 3,18   | 354,5  | **           |
|                           |               |                               |                |                      |                     |        |        |              |
|                           |               |                               | mhpcffpc       | 2_mvfbcd             | IV                  | 2,98   | 348,58 | **           |
|                           |               |                               |                | 11_mvffpa            | IV                  | 3,18   | 354,5  | **           |
|                           |               |                               | mhpcfcoa       | 2_mhpcfped           | I                   | 4,2    | 33,14  | **           |
|                           |               |                               |                | 9_mhpcfcoa           | I                   | 6,68   | 45     | **           |
|                           |               |                               |                | 3_mhptpea            | I                   | 4,82   | 75,63  | **           |
|                           |               | 8_mhptr                       |                | IV                   | 3,62                | 350,03 | **     |              |
|                           |               | Complete horinzontal Profile  | mhptpea        | 2_mhpcfped           | IV                  | 3,54   | 351,95 | **           |
|                           |               |                               |                | 9_mhpcfcoa           | I                   | 4,82   | 14,37  | **           |
|                           |               |                               | mhptfpc        | 2_mvffbc             | I                   | 3,67   | 90     | **           |
|                           |               |                               | mhptr          | 9_mhpcfcoa           | II                  | 3,62   | 99,97  | **           |
|                           |               |                               | mhptca         | 1_mvptbed            | II                  | 3,02   | 98,26  | **           |
|                           |               |                               |                |                      |                     |        |        |              |
|                           |               |                               |                |                      |                     |        |        |              |
|                           |               |                               |                |                      |                     |        |        |              |

| 7 AGE            |               |                               |                |                      |                     |        |        |              |
|------------------|---------------|-------------------------------|----------------|----------------------|---------------------|--------|--------|--------------|
| Character Rabbit | Macrocategory | Category                      | Focal behavior | Conditioned behavior | Significant vectors |        |        |              |
|                  |               |                               |                |                      | Quadrant            | Length | Angle  | Significance |
|                  | Estatic       |                               |                |                      |                     |        |        |              |
|                  | Indication    |                               |                |                      |                     |        |        |              |
| Character Rabbit | Movement      | Vertical-front                | 1_mvfcfcp      | 2_mvpcfps            | II                  | 2,64   | 97,58  | **           |
|                  |               |                               |                | 8_mhptoa             | IV                  | 2,64   | 352,42 | **           |
|                  |               |                               | 3_mvfbca       | 3_mvfbca             | I                   | 2,68   | 45     | **           |
|                  |               |                               |                | 2_mhpcffpc           | I                   | 3,06   | 24,01  | **           |
|                  |               |                               | 4_mvffba       | 6_mvfped             | IV                  | 3,03   | 342,98 | **           |
|                  |               |                               |                | 4_mvffba             | II                  | 3,03   | 107,02 | **           |
|                  |               |                               | 6_mvfped       | 6_mvfped             | I                   | 2,89   | 45     | **           |
|                  |               |                               |                | 2_mvptfbc            | II                  | 2,94   | 102,16 | **           |
|                  |               |                               | 8_mvfppe       | 2_mvptfbc            | IV                  | 3,31   | 342,76 | **           |
|                  |               | Vertical Face Front Profile   | 2_mvpcfps      | 1_mvfcfcp            | IV                  | 2,64   | 352,42 | **           |
|                  |               |                               |                | 6_mvfped             | I                   | 3,18   | 68,29  | **           |
|                  |               |                               | 4_mvpcffpc     | 6_mvpcffpa           | IV                  | 2,76   | 349,59 | **           |
|                  |               |                               |                | 6_mvfped             | I                   | 2,94   | 82,01  | **           |
|                  |               |                               | 6_mvpcffpa     | 4_mvpcffpc           | II                  | 2,76   | 100,41 | **           |
|                  |               |                               |                | 6_mvfped             | I                   | 4,32   | 76,19  | **           |
|                  |               | Complete Vertical Profile     | 2_mvptfbc      | 6_mvfped             | IV                  | 2,94   | 347,84 | **           |
|                  |               |                               |                | 8_mvfppe             | II                  | 3,31   | 107,24 | **           |
|                  |               | Horizontal Face Front Profile | 1_mhpcfped     | 3_mhptpea            | II                  | 2,7    | 100,65 | **           |
|                  |               |                               | 2_mhpcffpc     | 3_mvfbca             | I                   | 3,06   | 65,99  | **           |
|                  |               |                               |                | 3_mhptpea            | II                  | 2,71   | 97,4   | **           |
|                  |               |                               | 3_mhpcfppe     | 3_mhptpea            | II                  | 2,7    | 100,65 | **           |
|                  |               | Complete horinzontal Profile  | 3_mhptpea      | 1_mhpcfped           | IV                  | 2,7    | 349,35 | **           |
|                  |               |                               |                | 2_mhpcffpc           | IV                  | 2,71   | 352,6  | **           |
|                  |               |                               |                | 3_mhpcfppe           | IV                  | 2,7    | 349,35 | **           |
|                  |               |                               |                | 8_mhptoa             | II                  | 2,64   | 97,58  | **           |
|                  |               |                               | 8_mhptoa       | 3_mhptpea            | IV                  | 2,64   | 352,42 | **           |
| Character Rabbit | Macrocategory | Category                      | Focal behavior | Conditioned behavior | Significant vectors |        |        |              |
|                  |               |                               |                |                      | Quadrant            | Length | Angle  | Significance |
|                  | Estatic       |                               |                |                      |                     |        |        |              |
|                  | Indication    |                               |                |                      |                     |        |        |              |
|                  | Movement      | Vertical Face Front Profile   | 2_mvptfbc      | 3_mhpcfppe           | IV                  | 2,67   | 345,12 | **           |
|                  |               |                               |                | 6_mhptca             | I                   | 2,82   | 85,97  | **           |
|                  |               |                               | 4_mvptped      | 3_mhpcfppe           | IV                  | 2,67   | 245,12 | **           |
|                  |               |                               |                | 6_mhptca             | I                   | 2,82   | 85,97  | **           |
|                  |               | Horizontal Face Front Profile | 2_mhpcffpc     | 3_mhpcfppe           | IV                  | 2,71   | 345,34 | **           |
|                  |               |                               |                | 2_mvptfbc            | II                  | 2,67   | 104,88 | **           |
|                  |               |                               | 3_mhpcfppe     | 4_mvptped            | II                  | 2,67   | 104,88 | **           |
|                  |               |                               |                | 2_mhpcffpc           | II                  | 2,71   | 104,66 | **           |

|                      |               |                                  |                |                         |                     |        |        |              |    |
|----------------------|---------------|----------------------------------|----------------|-------------------------|---------------------|--------|--------|--------------|----|
|                      |               | Complete<br>horinzontal Profile  | 4_mhptfpa      | 2_mvptfbc               | IV                  | 3,28   | 354,88 | **           |    |
|                      |               |                                  |                | 4_mvptped               | IV                  | 3,28   | 354,88 | **           |    |
|                      |               |                                  | 6_mhptca       | 2_mvptfbc               | I                   | 2,82   | 4,03   | **           |    |
|                      |               |                                  |                | 4_mvptped               | I                   | 2,82   | 4,03   | **           |    |
|                      |               |                                  | 7_mhptfba      | 2_mvptfbc               | IV                  | 3,28   | 354,88 | **           |    |
|                      |               |                                  |                | 4_mvptped               | IV                  | 3,28   | 354,88 | **           |    |
| 8 AGE                |               |                                  |                |                         |                     |        |        |              |    |
| Character<br>Rabbitt | Macrocategory | Category                         | Focal behavior | Conditioned<br>behavior | Significant vectors |        |        |              |    |
|                      |               |                                  |                |                         | Quadrant            | Length | Angle  | Significance |    |
|                      | Estatic       |                                  |                |                         |                     |        |        |              |    |
|                      | Indication    |                                  |                |                         |                     |        |        |              |    |
|                      | Movement      | Vertical-front                   | 3_mvfbca       | 4_mvffbba               | I                   | 2,7    | 20,79  | **           |    |
|                      |               |                                  |                | 8_mvptfpa               | IV                  | 3,23   | 319,15 | **           |    |
|                      |               |                                  | 4_mvffbba      | 3_mvfbca                | I                   | 3,39   | 72,88  | **           |    |
|                      |               |                                  |                | 4_mvffbba               | IV                  | 3,45   | 356,1  | **           |    |
|                      |               |                                  |                | 5_mvpcfpe               | IV                  | 3,31   | 350,29 | **           |    |
|                      |               |                                  |                | 8_mvptfpa               | IV                  | 3,2    | 336,66 | **           |    |
|                      |               |                                  |                | 5_mvfps                 | 2_mhpcfped          | I      | 3,02   | 56,35        | ** |
|                      |               |                                  | 4_mhpcfpe      |                         | I                   | 3,02   | 56,35  | **           |    |
|                      |               |                                  | 6_mvfped       | 2_mhpcfped              | I                   | 3,32   | 53,67  | **           |    |
|                      |               |                                  |                | 4_mhpcfpe               | I                   | 3,32   | 53,67  | **           |    |
|                      |               |                                  | 7_mvfbca       | 1_mhpcfps               | II                  | 2,79   | 121,2  | **           |    |
|                      |               | Vertical Face Front<br>Profile   | 1_mvpcfpe      | 4_mvffbba               | II                  | 3,1    | 101,55 | **           |    |
|                      |               | Complete Vertical<br>Profile     | 2_mvptfbc      | 4_mhptfpa               | IV                  | 2,87   | 341,88 | **           |    |
|                      |               |                                  |                | 7_mvptfba               | 6_mvpcfba           | I      | 2,71   | 25,33        | ** |
|                      |               |                                  | 9_mvptpea      | 9_mvptpea               | I                   | 3,46   | 9,16   | **           |    |
|                      |               |                                  |                | 8_mvptfpa               | 3_mvfbca            | II     | 2,7    | 130,85       | ** |
|                      |               |                                  |                | 9_mvptpea               | 7_mvptfba           | I      | 3,46   | 80,84        | ** |
|                      |               | Horizontal Face<br>Front Profile | 1_mhpcfps      | 7_mvfbca                | IV                  | 2,79   | 328,8  | **           |    |
|                      |               |                                  | 2_mhpcfped     | 5_mvfps                 | I                   | 3,02   | 33,65  | **           |    |
|                      |               |                                  |                | 6_mvfped                | I                   | 3,32   | 36,33  | **           |    |
|                      |               |                                  | 4_mhpcfpe      | 6_mvfped                | I                   | 2,78   | 45,03  | **           |    |
|                      |               | Complete<br>horinzontal Profile  | 4_mhptfpa      | 2_mvptfbc               | II                  | 2,82   | 104,6  | **           |    |
| Character<br>Wolf    | Macrocategory | Category                         | Focal behavior | Conditioned<br>behavior | Significant vectors |        |        |              |    |
|                      |               |                                  |                |                         | Quadrant            | Length | Angle  | Significance |    |
|                      | Estatic       |                                  |                |                         |                     |        |        |              |    |
|                      | Indication    |                                  |                |                         |                     |        |        |              |    |
|                      | Movement      | Vertical-front                   | 1_mvfbca       | 5_mvfps                 | IV                  | 3,19   | 349,45 | **           |    |
|                      |               |                                  |                | 2_mvptfbc               | IV                  | 3,26   | 349,67 | **           |    |
|                      |               |                                  |                | 6_mhpcfbc               | IV                  | 3,15   | 349,33 | **           |    |
|                      |               |                                  | 4_mvffbba      | 1_mhptps                | I                   | 3,81   | 61,08  | **           |    |

|  |                             |                               |           |             |             |          |          |        |        |        |       |
|--|-----------------------------|-------------------------------|-----------|-------------|-------------|----------|----------|--------|--------|--------|-------|
|  |                             |                               |           | 6_mhptca    | I           |          | 3,12     | 70,93  | **     |        |       |
|  |                             |                               | 5_mvfps   | 1_mvfcf     | II          |          | 3,19     | 100,55 | **     |        |       |
|  |                             |                               |           | 2_mvptfbc   | II          |          | 2,89     | 96,56  | **     |        |       |
|  |                             |                               |           | 1_mhpcfyps  | IV          |          | 2,82     | 338,95 | **     |        |       |
|  |                             |                               |           | 2_mhpcfped  | IV          |          | 3,05     | 342,19 | **     |        |       |
|  |                             |                               |           | 6_mhpcfbc   | IV          |          | 2,92     | 353,51 | **     |        |       |
|  |                             |                               | 6_mvfped  | 7_mvptfba   | II          |          | 2,66     | 104,67 | **     |        |       |
|  |                             |                               |           | 8_mvptfpa   | II          |          | 2,73     | 110,9  | **     |        |       |
|  |                             |                               |           | 1_mhpcfyps  | IV          |          | 3,21     | 33,25  | **     |        |       |
|  |                             |                               |           | 2_mhpcfped  | IV          |          | 2,67     | 329,96 | **     |        |       |
|  |                             |                               | 7_mvfpca  | 7_mvptfba   | II          |          | 4,1      | 96,6   | **     |        |       |
|  |                             |                               |           | 8_mvptfpa   | II          |          | 2,69     | 104,67 | **     |        |       |
|  |                             | Complete Vertical Profile     | 2_mvptfbc | 1_mvfcf     | II          |          | 3,26     | 100,33 | **     |        |       |
|  |                             |                               |           | 5_mvfps     | IV          |          | 2,89     | 353,44 | **     |        |       |
|  |                             |                               |           | 6_mhpcfbc   | IV          |          | 2,85     | 353,37 | **     |        |       |
|  |                             |                               | 5_mvptfpc | 2_mhptped   | IV          |          | 2,89     | 322,06 | **     |        |       |
|  |                             |                               | 6_mvptca  | 7_mhptfba   | IV          |          | 2,62     | 345,08 | **     |        |       |
|  |                             |                               | 7_mvptfba | 6_mvfped    | IV          |          | 2,66     | 345,33 | **     |        |       |
|  |                             |                               |           | 7_mvfpca    | IV          |          | 4,1      | 353,4  | **     |        |       |
|  |                             |                               |           |             |             |          | 1_mhptps | I      |        | 3,22   | 45,96 |
|  |                             | 8_mvptfpa                     |           |             |             | 6_mvfped | IV       |        | 2,73   | 339,1  | **    |
|  |                             | 7_mvfpca                      |           |             |             | IV       |          | 2,69   | 345,33 | **     |       |
|  |                             | 9_mvptpca                     |           |             | 4_mhpcfpcpe | I        |          | 3,19   | 8,78   | **     |       |
|  |                             | Horizontal Face Front Profile |           |             | 1_mhpcfyps  | 5_mvfps  | II       |        | 2,82   | 111,05 | **    |
|  | 6_mvfped                    |                               |           |             |             | II       |          | 3,21   | 116,75 | **     |       |
|  | 2_mhpcfped                  |                               |           |             | 5_mvfps     | II       |          | 2,82   | 111,05 | **     |       |
|  |                             |                               |           |             | 6_mvfped    | II       |          | 3,21   | 116,75 | **     |       |
|  | 4_mhpcfpcpe                 |                               |           |             | 9_mvptpca   | I        |          | 3,19   | 81,22  | **     |       |
|  |                             |                               |           | 2_mhptped   | IV          |          | 3        | 312,8  | **     |        |       |
|  | 6_mhpcfbc                   |                               |           | 1_mvfcf     | II          |          | 3,15     | 100,67 | **     |        |       |
|  |                             |                               |           | 5_mvfps     | II          |          | 2,92     | 96,49  | **     |        |       |
|  |                             | 2_mvptfbc                     |           | II          |             | 2,85     | 96,63    | **     |        |        |       |
|  | Complete horizontal Profile | 1_mhptps                      |           | 4_mvffba    | I           |          | 3,9      | 24,69  | **     |        |       |
|  |                             |                               |           | 7_mvptfba   | I           |          | 3,22     | 44,04  | **     |        |       |
|  |                             |                               |           | 1_mhptps    | I           |          | 6,07     | 45     | **     |        |       |
|  |                             |                               |           | 6_mhptca    | I           |          | 4,91     | 46,4   | **     |        |       |
|  |                             | 2_mhptped                     |           | 5_mvptfpc   | II          |          | 2,89     | 127,94 | **     |        |       |
|  |                             |                               |           | 4_mhpcfpcpe | II          |          | 3        | 137,2  | **     |        |       |
|  |                             | 4_mhptfpa                     |           | 4_mhptfpa   | III         |          | 2,66     | 225    | **     |        |       |
|  |                             | 6_mhptca                      |           | 4_mvffba    | I           |          | 3,24     | 14,97  | **     |        |       |
|  |                             |                               |           | 1_mhptps    | I           |          | 4,91     | 43,6   | **     |        |       |
|  |                             |                               |           | 6_mhptca    | I           |          | 2,76     | 45     | **     |        |       |
|  |                             | 7_mhptfba                     |           | 6_mvptca    | II          |          | 2,62     | 104,92 | **     |        |       |
|  |                             | 7_mhptfbc                     |           | 1_mhptps    | III         |          | 1        | 0,62   | **     |        |       |
|  | 6_mhptca                    |                               |           | III         |             | 3,34     | 232,1    | **     |        |        |       |

Figure S1. Examples of drawings made by children in the three macrocategories of study: (a) static; (b) indication; (c) movement.

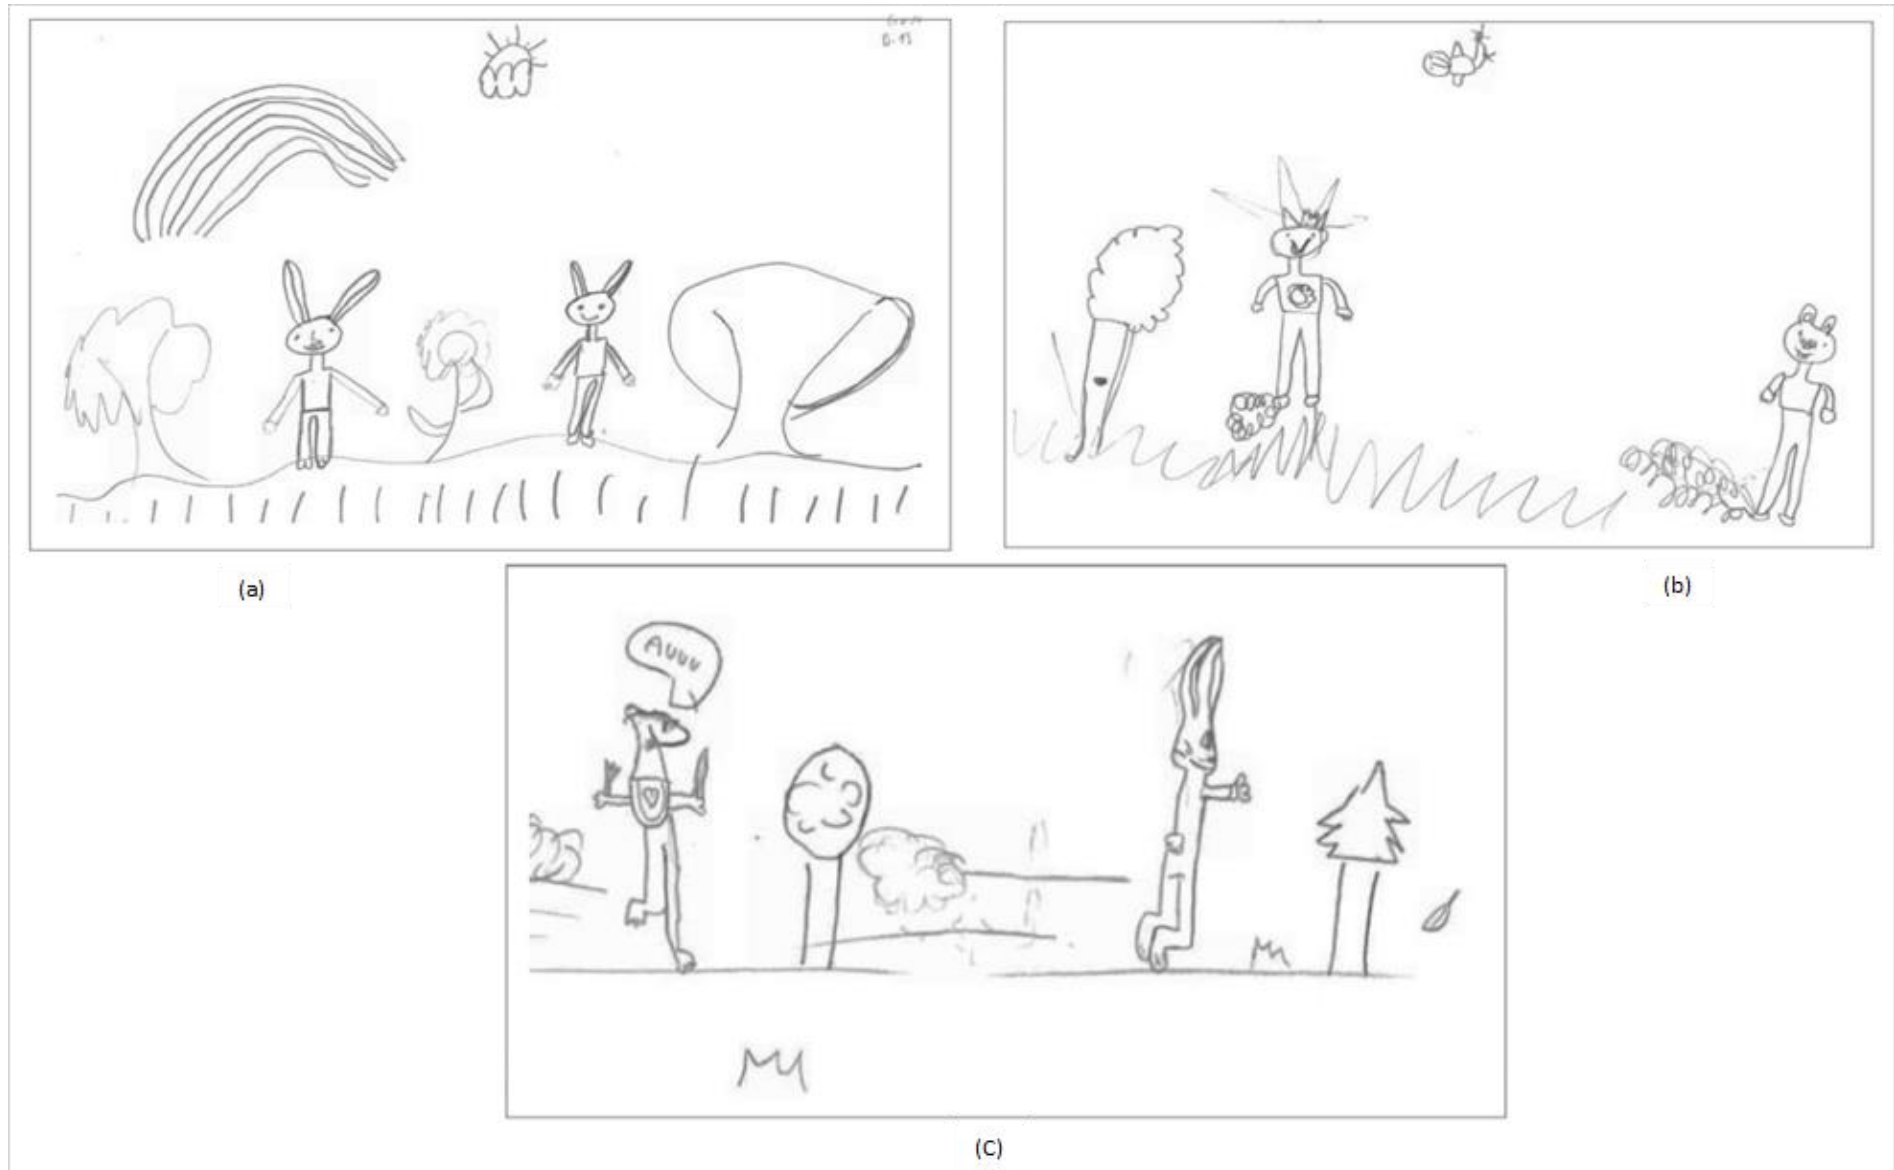

Supplement: s1 [file s1]
